# Supplementary material
Source: Springer Nature journal article supplement (https://www.springermedizin.de/resource/supplementary/12891_2010_1108_MOESM3_ESM.pdf/9507744)

## SF-12 measurement

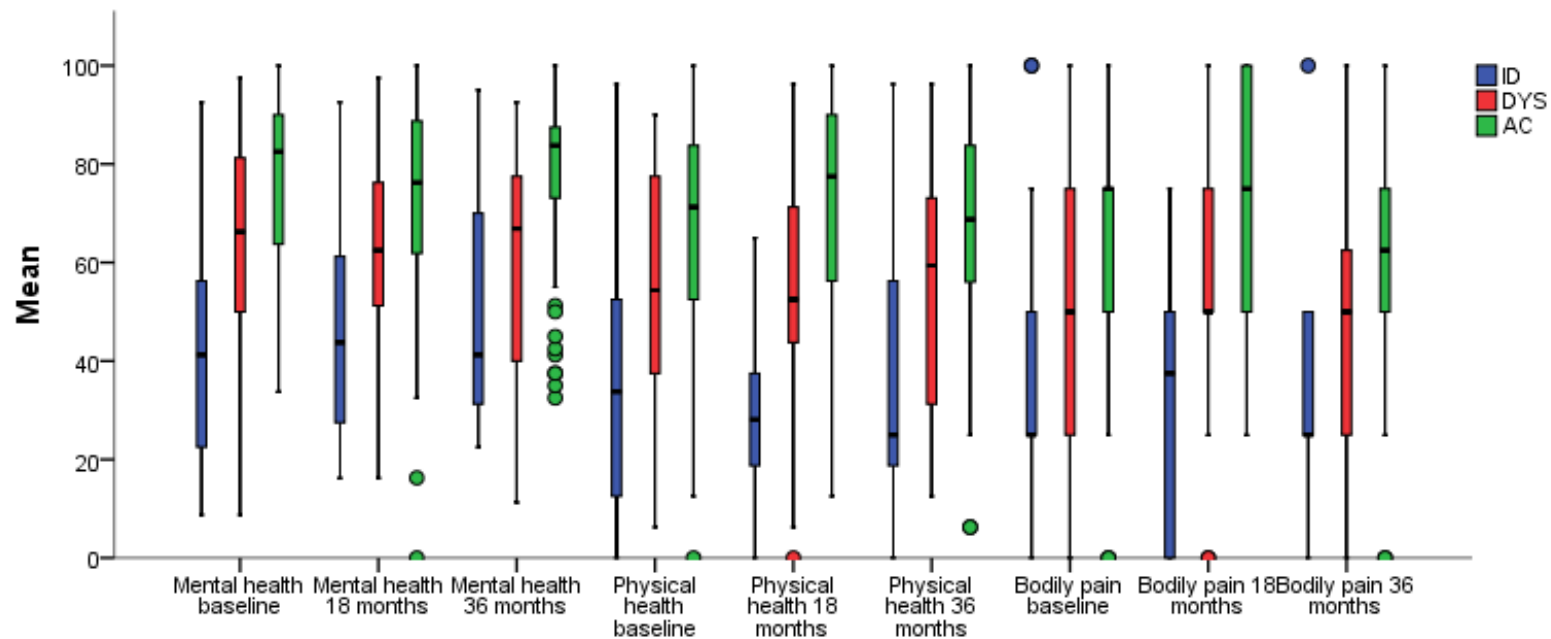

Supplement: MOESM3 [file 9507744]
